# Supplementary material for: Donor Preference Meets Heterochromatin: Moonlighting Activities of a Recombinational Enhancer in Saccharomyces cerevisiae
Source: Oxford University Press journal article supplement (doi:10.1534/genetics.116.194696), 2016-09-22
Supplement: figures1.pdf [file figures1.pdf]

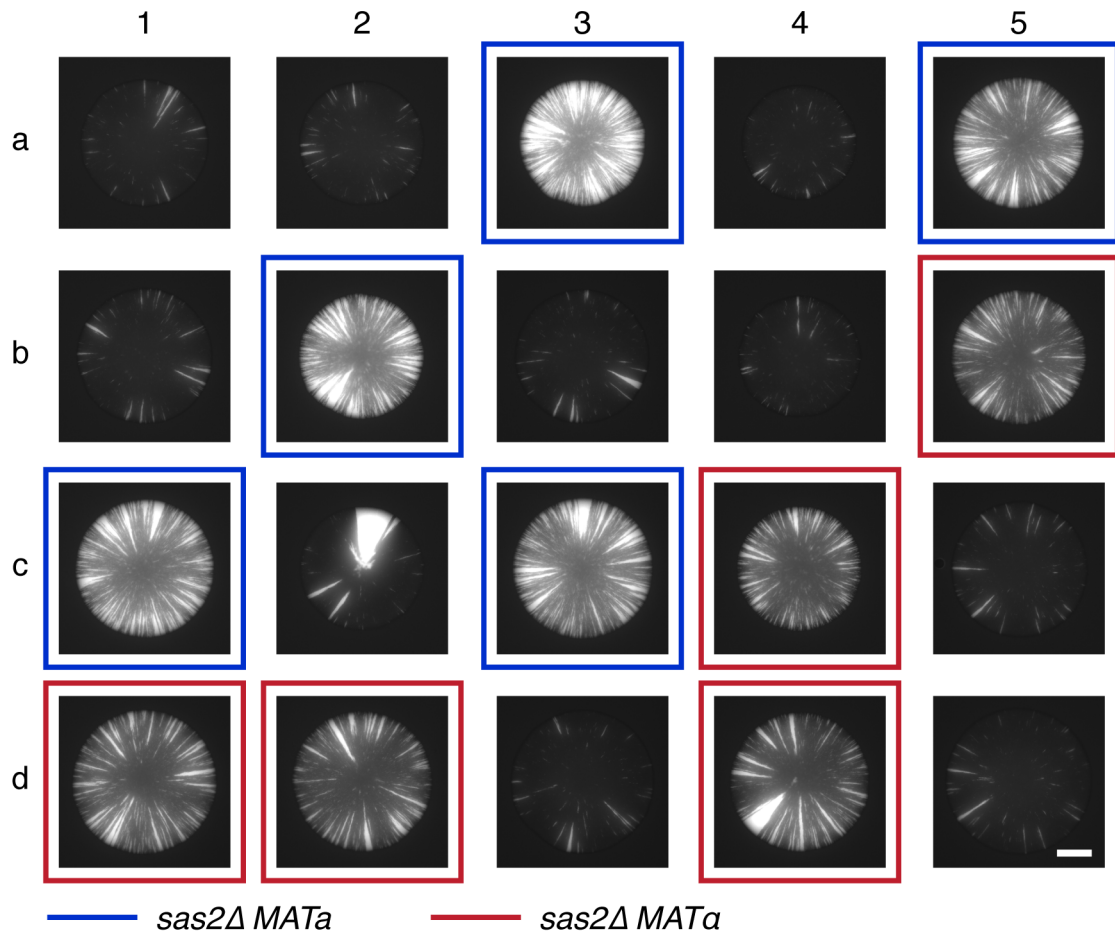

**Figure S1.** Tetrad analysis of a *sas2* hemizygote containing *HML::cre* and the RFP-GFP cassette (JRY10656). Images show GFP expression within colonies derived from the four spores (a-d) of individual tetrads (1-5). Boxes indicate spores that inherited the *sas2Δ* mutation. Scale bar, 1 mm.
