# Supplementary material for: Donor Preference Meets Heterochromatin: Moonlighting Activities of a Recombinational Enhancer in Saccharomyces cerevisiae
Source: Oxford University Press journal article supplement (doi:10.1534/genetics.116.194696), 2016-09-22
Supplement: tables1.xlsx [file tables1.xlsx]

## Sheet: Sheet1
Table S1. Strains used in this study.
Strain	Genotype
JRY10656	MATa/MATα lys2/lys2 his3-11,15/his3-11,15 leu2-3,112/leu2-3,112 can1-100/can1-100 sas2∆::natMX/SAS2 HMLα-α2∆::cre/HMLα-α2∆::cre ura3∆::RFP-GFPkanMX/ ura3∆::RFP-GFPhphMX
JRY10711	MATa lys2 his3-11,15 leu2-3,112 can1-100 sir1∆::LEU2 HMLα-α2∆::cre hmr∆::natMX ura3∆::RFP-GFPkanMX
JRY10712	MATα lys2 his3-11,15 leu2-3,112 can1-100 sir1∆::LEU2 HMLα-α2∆::cre hmr∆::natMX ura3∆::RFP-GFPkanMX
JRY10657	MATa lys2 his3-11,15 leu2-3,112 can1-100 sas2∆::natMX HMLα-α2∆::cre ura3∆::RFP-GFPkanMX
JRY10658	MATα lys2 his3-11,15 leu2-3,112 can1-100 sas2∆::natMX HMLα-α2∆::cre ura3∆::RFP-GFPkanMX
JRY10659	mat∆::K.l.URA3 lys2 his3-11,15 leu2-3,112 can1-100 sas2∆::natMX HMLα-α2∆::cre ura3∆::RFP-GFPkanMX
JRY10660	MATa lys2 his3-11,15 leu2-3,112 can1-100 sas2∆::natMX re∆::hphMX HMLα-α2∆::cre ura3∆::RFP-GFPkanMX
JRY10661	MATα lys2 his3-11,15 leu2-3,112 can1-100 sas2∆::natMX re∆::hphMX HMLα-α2∆::cre ura3∆::RFP-GFPkanMX
JRY10662	mat∆::K.l.URA3 lys2 his3-11,15 leu2-3,112 can1-100 sas2∆::natMX re∆::hphMX HMLα-α2∆::cre ura3∆::RFP-GFPkanMX
JRY10663	MATa lys2 his3-11,15 leu2-3,112 can1-100 sas2∆::natMX sir4∆::K.l.URA3 HMLα-α2∆::cre ura3∆::RFP-GFPkanMX
JRY10664	MATa lys2 his3-11,15 leu2-3,112 can1-100 sas2∆::natMX re-left∆::hphMX HMLα-α2∆::cre ura3∆::RFP-GFPkanMX
JRY10665	MATα lys2 his3-11,15 leu2-3,112 can1-100 sas2∆::natMX re-left∆::hphMX HMLα-α2∆::cre ura3∆::RFP-GFPkanMX
JRY10666	MATa lys2 his3-11,15 leu2-3,112 can1-100 sas2∆::natMX re-right∆::hphMX HMLα-α2∆::cre ura3∆::RFP-GFPkanMX
JRY10667	MATα lys2 his3-11,15 leu2-3,112 can1-100 sas2∆::natMX re-right∆::hphMX HMLα-α2∆::cre ura3∆::RFP-GFPkanMX
JRY10723	MATa lys2 his3-11,15 leu2-3,112 can1-100 sas2∆::natMX fkh1∆::K.l.LEU2 HMLα-α2∆::cre ura3∆::RFP-GFPkanMX
JRY10724	MATα lys2 his3-11,15 leu2-3,112 can1-100 sas2∆::natMX fkh1∆::K.l.LEU2 HMLα-α2∆::cre ura3∆::RFP-GFPkanMX
JRY10725	MATa lys2 his3-11,15 leu2-3-112 can1-100 sas2∆::natMX fkh1∆::K.l.LEU2 re∆::hphMX HMLα-α2∆::cre ura3∆::RFP-GFPkanMX
JRY10726	MATα lys2 his3-11,15 leu2-3-112 can1-100 sas2∆::natMX fkh1∆::K.l.LEU2 re∆::hphMX HMLα-α2∆::cre ura3∆::RFP-GFPkanMX
JRY10721	MATa lys2 his3-11,15 leu2-3,112 can1-100 sas2∆::natMX reSCB HMLα-α2∆::cre ura3∆::RFP-GFPkanMX
JRY10722	MATα lys2 his3-11,15 leu2-3,112 can1-100 sas2∆::natMX reSCB HMLα-α2∆::cre ura3∆::RFP-GFPkanMX
JRY10668	MATa lys2 his3-11,15 leu2-3,112 can1-100 sas2∆::natMX HMLα-α2∆::cre ura3∆::RFP-GFPkanMX pJR734 [HIS3]
JRY10669	MATα lys2 his3-11,15 leu2-3,112 can1-100 sas2∆::natMX HMLα-α2∆::cre ura3∆::RFP-GFPkanMX pJR734 [HIS3]
JRY10670	MATa lys2 his3-11,15 leu2-3,112 can1-100 sas2∆::natMX re∆::hphMX HMLα-α2∆::cre ura3∆::RFP-GFPkanMX pJR734 [HIS3]
JRY10671	MATα lys2 his3-11,15 leu2-3,112 can1-100 sas2∆::natMX re∆::hphMX HMLα-α2∆::cre ura3∆::RFP-GFPkanMX pJR734 [HIS3]
JRY10672	MATa lys2 his3-11,15 leu2-3,112 can1-100 sas2∆::natMX re∆::hphMX HMLα-α2∆::cre ura3∆::RFP-GFPkanMX pJR3389 [RE HIS3]
JRY10673	MATα lys2 his3-11,15 leu2-3,112 can1-100 sas2∆::natMX re∆::hphMX HMLα-α2∆::cre ura3∆::RFP-GFPkanMX pJR3389 [RE HIS3]
JRY10727	MATa lys2 his3-11,15 leu2-3,112 can1-100 sas2∆::natMX ars305∆::hphMX HMLα-α2∆::cre ura3∆::RFP-GFPkanMX
JRY10728	MATα lys2 his3-11,15 leu2-3,112 can1-100 sas2∆::natMX ars305∆::hphMX HMLα-α2∆::cre ura3∆::RFP-GFPkanMX
JRY10729	MATa lys2 his3-11,15 leu2-3,112 can1-100 sas2∆::natMX ars305∆::hphMX ars306∆::K.l.URA3 HMLα-α2∆::cre ura3∆::RFP-GFPkanMX
JRY10730	MATα lys2 his3-11,15 leu2-3,112 can1-100 sas2∆::natMX ars305∆::hphMX ars306∆::K.l.URA3 HMLα-α2∆::cre ura3∆::RFP-GFPkanMX
RFP-GFPkanMX, PGPD-loxP-yEmRFP-TCYC1-kanMX-loxP-yEGFP-TADH1
RFP-GFPhphMX, PGPD-loxP-yEmRFP-TCYC1-hphMX-loxP-yEGFP-TADH1
K.l., Kluyveromyces lactis
