# Supplementary material for: Donor Preference Meets Heterochromatin: Moonlighting Activities of a Recombinational Enhancer in Saccharomyces cerevisiae
Source: Oxford University Press journal article supplement (doi:10.1534/genetics.116.194696), 2016-09-22
Supplement: tables2.xlsx [file tables2.xlsx]

## Sheet: Sheet1
Table S2. Oligonucleotides used in this study.
Name	Sequence (5’-3’)
Oligonucleotides used for strain construction
sas2∆::natMX fwd	CCTATTTTCTAGTTGCTTTTTGTTTTCACTCGCAAAAAAAAGCTTGCCTTGTCCCCGCCG
sas2∆::natMX rev	TGAAATACATATGCCATTAAGTTACATCCTGAATAGATTCCGACACTGGATGGCGGCGTT
mat∆::K.l.URA3 fwd	CTCACTATCTTGCCAATAAGACTCTACCCAGATTTGTATTGTTTTATTTAGGTTCTATCG
mat∆::K.l.URA3 rev	GGTTAAGATAAGAACAAAGAATGATGCTAAGAATTGATTGCAATACAACAGATCACGTGA
re∆::hphMX fwd	ACAAAAAGCACAATAAAGCATCAACACATAAATCCTTGCTCGGATCCCCGGGTTAATTAA
re∆::hphMX rev	AAAATTAGACAAAAGAATAATAACGTAAGGTGAAAAATGTCGATGAATTCGAGCTCGTTT
re-left∆::hphMX rev	TATGTCACTGGACAATACAAATCTTTGGAAACCGTCCCTACGATGAATTCGAGCTCGTTT
re-right∆::hphMX fwd	TGTTATATTCTAAAGAGTTAAATTATCCAATTCCAAATTCCGGATCCCCGGGTTAATTAA
fkh1∆::K.l.LEU2 fwd	AATTAGCAAAGAAAGGCTTGGAGAGACACAGTAATAATAAGCTGTGAAGATCCCAGCAAA
fkh1∆::K.l.LEU2 rev	TATTGTTTAATAATACATATGGGTTCGACGACGCTGAATTAACCGGAACCTGTATTATTT
ars305∆::hphMX fwd	TATGACAGTATTTCAGGCCGCTCTTATAAAATGACATGTTCGGATCCCCGGGTTAATTAA
ars305∆::hphMX rev	ACTTTAATGAGTATTTGATCCTTTTTTTTATTGTGTTGGTCGATGAATTCGAGCTCGTTT
ars306∆::K.l.URA3 fwd	TAACGCGATTGTACGTTGACGTTAGTAAGTCACAAACCCAGTTTTATTTAGGTTCTATCG
ars306∆::K.l.URA3 rev	ACGTTTATCACTGAACAGGAAATTCGCATATGAGGAGATCCAATACAACAGATCACGTGA
REEagI fwd	CTAGACCGGCCGTAGCTCAATTAAATATACTA
REXhoI rev	GTCAGTCTCGAGTTAAACTCAATAGTGTGAGG
Oligonucleotides used for quantitative RT-PCR
ACT1 fwd	TGTCCTTGTACTCTTCCGGT
ACT1 rev	CCGGCCAAATCGATTCTCAA
cre fwd	CGTACTGACGGTGGGAGAAT
cre rev	CCCGGCAAAACAGGTAGTTA
CHA1 fwd	GCTAGTTCTGGCGGTAATGC
CHA1 rev	AGGCACCACTCACGATAACC
KRR1 fwd	CTGCCCAATTGCCTAGAAAG
KRR1 rev	TGCTTCTTCTTCCGGAGCTA
PRD1 fwd	CGCATCTGTGAACTCCTCAA
PRD1 rev	GTTTCCCTCGTCAAGTTCCA
K.l., Kluyveromyces lactis
