# Supplementary material for: Donor Preference Meets Heterochromatin: Moonlighting Activities of a Recombinational Enhancer in Saccharomyces cerevisiae
Source: Oxford University Press journal article supplement (doi:10.1534/genetics.116.194696), 2016-09-22
Supplement: tables3.xlsx [file tables3.xlsx]

## Sheet: Sheet1
Table S3. Plasmids used in this study.
Plasmid	Backbone	Description
pRS313	pRS313	HIS3 ampR CEN/ARS
pJR3389	pRS313	RE (chr III: 28,961-31,213) HIS3 ampR CEN/ARS
pJR3396	pRS303	reSCB HIS3 ampR
